## 1 Title

2 Profiling copy number variation and disease associations from 50,726 DiscovEHR Study  
3 exomes

## 5 Authors

6 Evan K. Maxwell<sup>1</sup>, Jonathan S. Packer<sup>1</sup>, Colm O'Dushlaine<sup>1</sup>, Shane E. McCarthy<sup>1</sup>, Abby Hare-  
7 Harris<sup>2</sup>, Jeffrey Staples<sup>1</sup>, Claudia Gonzaga-Jauregui<sup>1</sup>, Samantha N. Fetterolf<sup>2</sup>, W. Andrew  
8 Faucett<sup>2</sup>, Joseph B. Leader<sup>2</sup>, Andres Moreno-De-Luca<sup>2</sup>, Giusy Della Gatta<sup>1</sup>, Margaret Scollan<sup>1</sup>,  
9 Trikaladarshi Persaud<sup>1</sup>, John Penn<sup>1</sup>, Alicia Hawes<sup>1</sup>, Xiaodong Bai<sup>1</sup>, Sarah Wolf<sup>1</sup>, Alexander E.  
10 Lopez<sup>1</sup>, Rick Ulloa<sup>1</sup>, Christopher Sprangel<sup>1</sup>, Rostislav Chernomorsky<sup>1</sup>, Ingrid B. Borecki<sup>1</sup>,  
11 Frederick E. Dewey<sup>1</sup>, Aris N. Economides<sup>1</sup>, John D. Overton<sup>1</sup>, H. Lester Kirchner<sup>2</sup>, Michael F.  
12 Murray<sup>2</sup>, Marylyn D. Ritchie<sup>2</sup>, David J. Carey<sup>2</sup>, David H. Ledbetter<sup>2</sup>, George D. Yancopoulos<sup>1</sup>,  
13 Alan R. Shuldiner<sup>1</sup>, Aris Baras<sup>1</sup>, Omri Gottesman<sup>1</sup>, Lukas Habegger<sup>1</sup>, Christa Lese Martin<sup>2</sup>,  
14 Jeffrey G. Reid<sup>1\*</sup>

## 16 Affiliations

17 <sup>1</sup>Regeneron Genetics Center, Regeneron Pharmaceuticals, Tarrytown, NY, 10591

18 <sup>2</sup>Geisinger Health System, Danville, PA, 17822

19 \*Corresponding author: [jeffrey.reid@regeneron.com](mailto:jeffrey.reid@regeneron.com)

## 21 Abstract

22 Copy number variants (CNVs) are a substantial source of genomic variation and contribute to a  
23 wide range of human disorders. Gene-disrupting exonic CNVs have important clinical  
24 implications as they can underlie variability in disease presentation and susceptibility. The  
25 relationship between exonic CNVs and clinical traits has not been broadly explored at the

26 population level, primarily due to technical challenges. We surveyed common and rare CNVs in  
27 the exome sequences of 50,726 adult DiscovEHR study participants with linked electronic  
28 health records (EHRs). We evaluated the diagnostic yield and clinical expressivity of known  
29 pathogenic CNVs, and performed tests of association with EHR-derived serum lipids, thereby  
30 evaluating the relationship between CNVs and complex traits and phenotypes in an unbiased,  
31 real-world clinical context. We identified CNVs from megabase to exon-level resolution,  
32 demonstrating reliable, high-throughput detection of clinically relevant exonic CNVs. In doing so,  
33 we created a catalog of high-confidence common and rare CNVs and refined population  
34 frequency estimates of known and novel gene-disrupting CNVs. Our survey among an  
35 unselected clinical population provides further evidence that neuropathy-associated duplications  
36 and deletions in 17p12 have similar population prevalence but are clinically under-diagnosed.  
37 Similarly, adults who harbor 22q11.2 deletions frequently had EHR documentation of  
38 neurodevelopmental/neuropsychiatric disorders and congenital anomalies, but not a formal  
39 genetic diagnosis (i.e., deletion). In an exome-wide association study of lipid levels, we  
40 identified a novel five-exon duplication within *LDLR* segregating in a large kindred with features  
41 of familial hypercholesterolemia. Exonic CNVs provide new opportunities to understand and  
42 diagnose human disease.

43

## 44 **Introduction**

45 Copy-number variants (CNVs), a type of structural variation, are regions of the genome  
46 that deviate from the expected normal diploid state as a result of deletion or duplication events.  
47 CNVs have been shown to cause or increase risk of a number of diseases<sup>1</sup>. Thus a  
48 comprehensive view of CNVs may further our understanding of the genetic bases of human  
49 health and disease in service of precision medicine. CNV detection in large clinical and research  
50 cohorts is generally performed using array-based technologies given considerations of cost,  
51 reliability, and throughput<sup>2</sup>. However, commercially available array-based technologies, or  
52 custom-designed arrays used in some clinical laboratories, are limited by probe design and  
53 density, achieving a maximum resolution of 5 kb or larger, with calls spanning 50-250 kb being  
54 the most reliable. This has additional technical biases and leaves a major class of smaller,  
55 exonic CNVs undetected by clinical genomic testing.

56 While genomic sequencing (whole-exome and whole-genome) is becoming a common  
57 diagnostic tool, CNV ascertainment from sequence data is not standard practice due to  
58 complexities in reliable detection. Whole-genome sequencing can achieve base-pair  
59 resolution<sup>3,4</sup>, but the cost and analytical challenges have thus far limited its application. Exome  
60 sequencing provides a balance of resolution, throughput, and cost, making it a more cost-  
61 effective choice for clinical labs and population-scale cohort studies, however exome-based  
62 CNV detection methods have faced significant technical challenges limiting their adoption<sup>5,6</sup>. We  
63 recently developed a high-throughput exome-CNV detection method CLAMMS<sup>7</sup> that enables  
64 reliable common and rare CNV detection across the size spectrum at population-scale. In this  
65 study, we sought to explore the phenotypic consequences of exonic CNVs identified in a large  
66 clinical care population.

67

## 68 **RESULTS**

69

## 70 **Spectrum of CNVs in DiscovEHR Participants**

71 We applied CLAMMS<sup>7</sup> to the sequenced exomes of 50,726 adult patient-participants who  
72 receive health care through the Geisinger Health System (GHS), all of whom consented to  
73 participate in the MyCode® Community Health Initiative biobank<sup>8</sup> and contributed DNA samples  
74 for genomic sequencing and analysis as part of the Regeneron-GHS DiscovEHR Study<sup>9</sup>. Each  
75 exome is linked to de-identified data extracted from the individual's electronic health record  
76 (EHR), with a median of 13.4 years of longitudinal clinical data available. The sequenced cohort  
77 is highly homogeneous in terms of European ancestry (~97%). While the DiscovEHR Study is  
78 not targeted towards any particular age or phenotype, the first 50,000 individuals recruited are  
79 enriched for adults (mean age = 61 years) with chronic health problems who interact frequently  
80 with the healthcare system, as well as patient-participants sequenced from the Coronary  
81 Catheterization Laboratory and the Bariatric Surgery Clinic.

82       Following application of quality control filters (**Methods**), our high-confidence CNV call  
83 set includes 47,349 participants (>93%) and 475,664 CNV events at 13,782 loci  
84 (**Supplementary Table S2**). The median size of observed common CNV loci (allele frequency  
85 (AF)  $\geq 1\%$ ) is 7.1 kb (deletions 4.4 kb, duplications 13.4 kb), compared to 17.8 kb (deletions  
86 8.4 kb, duplications 32.8 kb) in rare CNV loci (AF < 1%). On average, we observed ~10 high-  
87 confidence exonic CNV alleles affecting 14 genes per individual, most of which are common  
88 (6.6 deletions and 1.7 duplications, considering only highly mappable regions of the exome). We  
89 found an average of one very rare CNV allele per individual (AF < 0.1%; 0.6 duplications and  
90 0.4 deletions; **Fig. 1B, Supplementary Table S2**), and roughly one out of seven individuals  
91 possesses at least one CNV that is unique to their exome, relative to the cohort. The vast  
92 majority (91%) of CNV loci are extremely rare, observed in fewer than 10 individuals (AF <  
93 0.01%) in our sequenced cohort, with over half representing singletons (**Supplementary Fig.**  
94 **S2**). In total, 13,170 genes are intersected by at least one CNV of less than 2 Mb in length

95 (~73% of the total callable gene set; **Supplementary Table S2**), and, concordant with other  
96 surveys<sup>3,10</sup>, loss-of-function intolerant genes are heavily depleted for observed deletions  
97 compared to duplications (**Fig. 1C, Supplementary Methods**). In our accompanying linkage  
98 disequilibrium map, only half of common CNVs and 30 rare CNVs (0.2%) are well tagged ( $r^2 \geq$   
99 0.3) by a SNP marker, suggesting these CNVs cannot be captured or imputed from genotyping  
100 arrays (**Supplementary Methods**).

### 101 **Segregation of CNVs in Computationally Inferred Kindreds**

102 Cross-referencing CNVs with computationally inferred pedigrees (**Supplementary Methods**)  
103 enables tracking of familial variants as well as analysis of transmission rates, providing  
104 estimates of cohort-wide call sensitivity and specificity. The call set exhibits an average parent-  
105 child transmission rate of ~46.5% for rare heterozygous CNVs, consistent with a theoretical rate  
106 of 50% assuming equal probability of transmission and lack of transmission disequilibrium. This  
107 includes many rare small CNVs ( $\leq 3$  exons, 0.54 per sample cohort-wide) transmitted at  
108 42.17%. We validated, using qPCR, a sample of 100 high-confidence CNVs identified in 259  
109 parent-child duos (**Methods**), estimating precision and recall to be 98% and 92%, respectively,  
110 in the smallest class of exonic CNVs (1-3 exons). Comparatively, an alternative (and widely  
111 used) exome CNV calling method, XHMM<sup>11</sup>, achieved only 36.1% recall (1% for single-exon  
112 calls) with 96.8% precision in this size range (**Supplementary Table S3 & Methods**).

### 113 **Prevalence and Clinical Impact of Disease-associated Exonic CNVs**

114 We surveyed frequencies of a selected set of known disease-associated CNVs likely reflecting  
115 the spectrum of coding CNVs expected in a broad, predominately European hospital-based  
116 population (**Table 1**). This EHR-linked resource provided the opportunity to evaluate penetrance  
117 and expressivity of Mendelian disease-associated CNVs and to characterize the clinical  
118 consequences of other exonic CNVs among a broadly sampled adult population.

119 We identified 12 patient-participants with 22q11.2 deletion syndrome (MIM #188400),  
120 two of which are from the same family. This deletion is one of the most common and clinically

121 documented recurrent CNVs; our observed prevalence of 1 in 3,946 in the DiscovEHR cohort is  
122 in line with previous estimates of 1 in 4,000 live births<sup>12</sup>. Of the 12 participants with a 22q11.2  
123 deletion, 10 (83%) had ICD-9 codes consistent with the 22q11.2 deletion syndrome phenotype,  
124 including 8 (67%) with a diverse set of neurodevelopmental/neuropsychiatric disorders (NDD)  
125 and 6 (50%) with congenital anomalies, with 5/12 (42%) participants having both NDD and  
126 congenital anomaly phenotypes reported (**Supplementary Methods**). However, only one  
127 patient-participant (age 50 years old) with a 22q11.2 deletion had a specific genetic diagnosis of  
128 velocardiofacial syndrome (ICD 758.32) documented in their EHR, suggesting that most  
129 individuals are likely unaware of the genetic etiology of their clinical phenotypes.

130 We also found 25 patient-participants with 17p12 duplications that include the *PMP22*  
131 gene; 21 having duplications spanning the common recurrent CNV locus associated with the  
132 most common form of peripheral neuropathy, Charcot-Marie-Tooth disease type 1A (CMT1A;  
133 MIM #118220)<sup>13</sup>, three with atypical duplications in two families, and one with breakpoints that  
134 could not be reliably estimated (**Supplementary Fig. S12**). Fourteen out of 21 of the patient-  
135 participants with a common recurrent duplication and 2/3 with an atypical duplication (a parent-  
136 child duo) had a clinical diagnosis of CMT1A. Seven out of 21 individuals with a recurrent  
137 duplication had non-specific diagnoses consistent with CMT1A recorded in their EHR  
138 (**Supplementary Methods**). Three patient-participants had neuropathy phenotypes attributed to  
139 type-2 diabetes, suggesting a possible misdiagnosis of the primary hereditary neuropathy.  
140 Similarly, we identified and validated 26 patient-participants with the reciprocal 17p12 deletion  
141 associated with Hereditary Neuropathy with liability to Pressure Palsies (HNPP; MIM  
142 #162500)<sup>13</sup>, all of which spanned the common recurrent CNV region. However, only 1/26  
143 patient-participants had a clinical diagnosis of HNPP in their EHR and 6 had consistent, but  
144 non-specific diagnoses. Our observed population frequencies for the recurrent CMT-associated  
145 duplication (1/2,255 total, 1/2,785 *de novo*; **Supplementary Methods**) and the related HNPP-  
146 associated deletion (1/1,821 total, 1/2,255 *de novo*) are roughly equal, but their EHR-based

147 diagnostic rates are vastly different, suggesting that the deletion is largely clinically under-  
148 diagnosed. Forty-nine patient-participants with 17p12 CNVs and five non-carrier relatives were  
149 validated with qPCR, demonstrating accurate identification of this clinically relevant CNV from  
150 the exome data (**Supplementary Fig. S12 & Methods**).

151 Finally, among 323 patient-participants with 2q13 deletions encompassing the entirety of  
152 the nephronophthisis-1 (*NPHP1*) gene, we identified two individuals with homozygous deletions.  
153 Both of these individuals (age 31 and 38 years) had a documented diagnosis of medullary cystic  
154 kidney (ICD 753.16) and end stage renal disease (ICD 585.6) requiring transplantation,  
155 consistent with autosomal recessive juvenile nephronophthisis (OMIM #256100). These results  
156 exemplify the importance of differentiating heterozygous versus homozygous deletions for  
157 clinical correlations.

#### 158 **Exome-wide analysis of associations of exonic CNVs with serum lipid levels**

159 We next tested the ability to identify novel disease susceptibility loci through the intersection of  
160 exome CNVs and EHR-derived phenotypes. We performed an exome-wide association study of  
161 our CNV loci with fasting serum lipid levels (**Methods**), which are heritable risk factors for  
162 ischemic cardiovascular disease, in a subset of 39,087 individuals with available lipid data. At a  
163 Bonferroni-corrected significance threshold of  $p < 1.2 \times 10^{-5}$ , three CNV loci significantly  
164 associated with lipid levels (**Table 2**). We then evaluated the penetrance of these lipid-  
165 associated variants to coronary artery disease (CAD).

166 A novel duplication of g.chr19:11230767-11241993 (hg19/GRCh37) encompassing  
167 exons 13-17 of the low-density lipoprotein receptor gene *LDLR* was identified in 29 individuals  
168 and found to be associated with high LDL cholesterol ( $\beta = 1.73$  [76 mg/dl],  $p = 1.3 \times 10^{-13}$ ) and high  
169 total cholesterol ( $\beta = 1.38$  [61 mg/dl],  $p = 3.8 \times 10^{-9}$ ; **Methods**). Breakpoints were identified in *Alu*  
170 repeats within introns 12 and 17 using whole-genome sequencing, confirming a tandem  
171 insertion site predicted to occur in-frame (**Fig. 2A**). The duplication was validated in all carriers  
172 by Sanger sequencing (**Supplementary Fig. S6**). CNVs have previously been reported in

173 *LDLR*<sup>14</sup>; however, this duplication appears to be novel. In overexpression experiments in  
174 HEK293 cells (**Supplementary Methods**), *LDLR* containing the exon 13-17 tandem duplication  
175 (Dup13-17) produced a larger protein product than the wild-type (WT) receptor that accumulates  
176 in the endoplasmic reticulum. As a result, the mutant receptor is not expressed on the cellular  
177 surface and has no LDL uptake activity. Thus, the duplication behaves similarly to the known  
178 FH-causing p.G549D point mutation, classified as a transport-inhibiting (class-2) mutation (**Figs.**  
179 **2B-E & S13**). Taken together, this evidence suggests that the duplication causes loss-of-  
180 function of LDL receptor activity.

181         The *LDLR* duplication associates with markedly increased CAD risk (OR=5.01, Logistic  
182 regression,  $p=6 \times 10^{-4}$ ). Using pedigree reconstruction and distant-relatedness analysis  
183 (**Supplementary Methods**), we connected 27/29 carriers into a single large estimated  
184 pedigree, dating their common ancestor to at least six generations ago and identifying 10  
185 related individuals not harboring the *LDLR* duplication (**Fig. 2C**). In this extended pedigree, the  
186 duplication segregated with high LDL levels and 15/29 duplication carriers had ischemic heart  
187 disease (IHD) diagnoses, 11 of who presented with early-onset IHD (**Supplementary**  
188 **Methods**). Given the genetic and functional evidence, and the observation that familial  
189 hypercholesterolemia (FH) cases are frequently attributed to *LDLR* mutations<sup>14</sup>, we conclude  
190 that this is a novel pathogenic FH-causing CNV. Present in 1/1,749 samples, this novel *LDLR*  
191 duplication represents roughly 13% of the pathogenic FH variants (30% of those specific to  
192 *LDLR*) observed in our cohort, which have an overall prevalence of 1:256 unselected individuals  
193 in sequenced participants<sup>15</sup>. Notably, only eight patient-participants carrying the *LDLR*  
194 duplication and one relative without the duplication have a probable FH diagnosis coded in their  
195 EHR (**Supplementary Methods**).

196         We also identified a common deletion encompassing the last 6/7 exons of the leukocyte  
197 immunoglobulin (Ig)-like receptor A3 gene (*LILRA3*; AF  $\cong$  17%, consistent with previous  
198 estimates in Europeans<sup>16</sup>), that was associated with increased HDL levels ( $\beta=0.05$  [0.65 mg/dl],



199  $p=4.5 \times 10^{-7}$ , **Methods**). No association with the prevalence of CAD was observed. While the size  
200 of this variant (~2.6 kb exonic, 6.7 kb genomic) is not amenable to detection with standard  
201 clinical CNV arrays, CLAMMS calls at this locus were previously qPCR-validated in 165  
202 samples (69 CNV carriers) with perfect sensitivity and specificity<sup>7</sup>. Genome-wide association  
203 studies (GWAS) have identified SNVs adjacent to *LILRA3* that associate with HDL levels<sup>17</sup>; our  
204 analysis revealed that the deletion and GWAS SNV (rs386000) are in linkage disequilibrium  
205 ( $r^2=0.77$ ,  $D'=0.959$ ; **Supplementary Dataset S2**). Multiple expression quantitative trait loci  
206 (eQTLs) have been mapped to *LILRA3*, but the deletion is likely to be driving the effect<sup>18</sup> and  
207 contributing to the variation in HDL levels. This deletion has previously been investigated for  
208 association with other diseases<sup>16</sup>; we observed nominally increased risk for rheumatoid arthritis  
209 ( $p=0.041$ , OR=1.1, 95% confidence interval=[1.004,1.223], logistic regression) and decreased  
210 risk for prostate malignancies ( $p=0.045$ , OR=0.9, 95% confidence interval=[0.797,0.997], logistic  
211 regression) among carriers (**Supplementary Methods**). Further testing of this *LILRA3* CNV in  
212 other well-powered cohorts will shed light into the true genotype-phenotype associations. In  
213 addition to *LILRA3* deletions, we demonstrate the ability to detect a small, complex CNV in the  
214 haptoglobin gene (*HP*) through a single mappable exon well enough to recapitulate the  
215 directionality of previously observed associations with increased LDL and total cholesterol<sup>19</sup>  
216 (**Supplementary Methods**).

217

## 218 **DISCUSSION**

219 Our study demonstrates the utility of exome sequencing data for analyzing common and  
220 rare CNVs in the emerging paradigm of precision medicine using EHR-derived health  
221 information. We show robust detection of small exonic CNVs well below the size threshold of  
222 array-based technologies (**Supplementary Methods**), providing further evidence that the

223 density of markers on genotyping arrays is insufficient for characterizing the full CNV spectrum  
224 in humans and necessitates higher resolution methods (**Supplementary Fig. S4**).

225 Our catalog of exonic CNVs represents a substantial source of genomic variation in the  
226 DiscovEHR study population and exemplifies the clinical value of CNVs. We survey the clinical  
227 expressivity of known pathogenic CNVs, and via exome-wide associations with serum lipid  
228 traits, discover a novel duplication in *LDLR* causing familial hypercholesterolemia (FH). Among  
229 both known and novel pathogenic CNVs, the genetic basis for disease is frequently under-  
230 diagnosed. Clinical variability is common among individuals with known recurrent CNVs (e.g.  
231 17p12 CNVs and 22q11.2 deletion syndrome), presenting a diagnostic challenge to clinicians,  
232 especially in patients with more mild symptoms and those born before the widespread use of  
233 clinical genetic testing. In the case of the *LDLR* duplication, this novel CNV is undetectable with  
234 standard genetic screening platforms; thus, the handful of carriers with FH-consistent EHR  
235 documentation were diagnosed based on clinical features, not the underlying genetic cause.  
236 Combined with other reports of *LDLR* rearrangements<sup>14,20</sup> and the density of *Alu* repeat  
237 elements ( $2.24 \times 10^{-3}$  per base intronic sequence, 99.4<sup>th</sup> percentile for intron-containing genes;  
238 **Supplementary Methods**), *LDLR* may be particularly prone to genomic rearrangements<sup>21</sup>.  
239 These data highlight the potential for high-throughput CNV screening to improve diagnostic  
240 rates for FH and inform patient treatment.

241 With the growing prevalence of whole-exome and whole-genome sequencing, the  
242 substantial body of literature implicating CNVs in both rare and common disease, and the  
243 magnitude of copy-number variation we observe in the exome, the inclusion of methods to  
244 identify CNVs and other structural variants within standard sequence-based informatics  
245 pipelines is long overdue. In addition, the ability to identify rare homozygous deletions (e.g.  
246 2q13) in large cohort studies, like DiscovEHR, will contribute to human gene knockout catalogs  
247 and the identification of autosomal recessive conditions. As we find that over 90% of distinct  
248 CNVs are present in less than 1/5,000 individuals; large sample sizes or targeted recruitment of

249 additional family members are essential to establish phenotypic associations. Furthermore,  
250 detection of exonic and larger clinically relevant CNVs from exome sequence data will  
251 streamline genetic testing so that both sequence and copy number variants can be called from  
252 one test methodology. The ability to obtain a more comprehensive view of human genetic  
253 variation, both per individual and across populations, will facilitate the advent of precision  
254 medicine.

255

## 256 **METHODS**

### 257 ***Study population***

258 The human genetics studies were conducted as part of the DiscovEHR study of the Regeneron  
259 Genetics Center and the Geisinger Health System. Patient-participants who receive health care  
260 through Geisinger Health System were consented to participate in the MyCode Community  
261 Health Initiative and DiscovEHR cohort following an IRB approved protocol<sup>8</sup>. DNA samples and  
262 exome data from 50,726 adult patient-participants were included in this study. Detailed  
263 information on the clinical characteristics of this cohort can be found in<sup>22</sup>. The Regeneron  
264 Genetics Center funded study sample collection, sequence data generation, and clinical and  
265 sequence data analysis. All participants gave informed written consent.

### 266 ***Sample preparation and sequencing***

267 Genomic DNA samples were transferred to the Regeneron Genetics Center from the Geisinger  
268 Health System in 2D matrix tubes (Thermo Scientific, Waltham, MA), logged into our LIMS  
269 (Sapio Sciences, Baltimore, MD), and stored in our automated biobank at -80°C (LiCONiC  
270 TubeStore, Woburn, MA). Sample quantity was determined by fluorescence (Life Technologies,  
271 Carlsbad, CA) and quality assessed by running 100ng of sample on a 2% pre-cast agarose gel  
272 (Life Technologies). The DNA samples were normalized and one aliquot was sent for  
273 genotyping (Illumina Inc., San Diego, CA, Human OmniExpress Exome Beadchip) and another

274 sheared to an average fragment length of 150 base pairs using focused acoustic energy  
275 (Covaris LE220, Woburn, MA). The sheared genomic DNA was prepared for exome capture  
276 with a custom reagent kit from Kapa Biosystems (Wilmington, MA) using a fully-automated  
277 approach developed at the Regeneron Genetics Center (Tarrytown, NY). A unique 6 base pair  
278 barcode was added to each DNA fragment during library preparation to facilitate multiplexed  
279 exome capture and sequencing. Equal amounts of sample were pooled prior to exome capture  
280 with NimbleGen (Roche NimbleGen, Madison, WI) probes (SeqCap VCRome). Captured  
281 fragments were bound to streptavidin-conjugated beads and non-specific DNA fragments  
282 removed by a series of stringent washes according to the manufacturer's recommended  
283 protocol (Roche NimbleGen). The captured DNA was PCR amplified and quantified by qRT-  
284 PCR (Kapa Biosystems). The multiplexed samples were sequenced using 75 bp paired-end  
285 sequencing on an Illumina v4 HiSeq 2500 to a coverage depth sufficient to provide greater than  
286 20x haploid read depth of over 85% of targeted bases in 96% of samples (approximately 80x  
287 mean haploid read depth of targeted bases).

288       Upon completion of sequencing, raw data from each Illumina HiSeq 2500 run was  
289 gathered in local buffer storage and uploaded to the DNAnexus (Mountain View, CA) platform<sup>23</sup>  
290 for automated analysis. Sample-level read files were generated with CASAVA (Illumina Inc.)  
291 and aligned to GRCh37.p13 with BWA-mem<sup>24,25</sup>. The resultant BAM files were processed using  
292 GATK<sup>26</sup> and Picard to sort, mark duplicates, and perform local realignment of reads around  
293 putative indels.

#### 294 **CNV calling and quality control**

295 CLAMMS<sup>7</sup> was applied to the exomes of all samples in parallel within a distributed compute  
296 environment. CLAMMS calls CNVs from each sample's source BAM file using 1) base-level  
297 depth-of-coverage calculations from aligned reads having mapping quality  $\geq 30$ , and 2) seven  
298 sequencing quality control (QC) metrics computed using Picard  
299 (<http://broadinstitute.github.io/picard/>). Depth-of-coverage profiles are generated for exon

300 “windows” representing either the entire exon or a 500-1000 base pair contiguous segment of  
301 an exon for long exons. Exon window coverage distributions are normalized independently for  
302 every sample, adjusting for GC content and overall sequencing depth. CLAMMS detects CNVs  
303 by comparing a sample’s normalized coverage profile to a reference panel of 100 samples  
304 matched with respect to QC metrics via a k-nearest neighbors search, where expected  
305 coverage distributions are modelled with exon-window specific mixture models linked together  
306 with a genomic distance-aware Hidden Markov Model (HMM).

307 Extensive quality control procedures were applied to the call set with the goal of  
308 producing a set of CNV loci exhibiting high specificity (see **Supplementary Methods**). Briefly,  
309 the sample set was filtered of “outlier” samples having inflated CNV rates (>28 CNVs, 2x  
310 median) resulting in a high-confidence call set containing 47,349 samples (93%). CNVs in the  
311 remaining samples were annotated with: 1) two model-based metrics from CLAMMS ( $Q_{\text{non\_dip}}$   
312 and  $Q_{\text{exact}}$ , representing confidence measures that the region is non-diploid and consistent with  
313 the exact called copy number, respectively), 2) allele balance and zygosity of SNVs within called  
314 CNV regions, 3) the frequency of overlapping CNVs among outlier samples, and 4) the quality  
315 and zygosity measures for all non-outlier carriers of the locus (representing cohort-wide locus  
316 performance). Filtering criteria based on these annotations were trained with respect to the  
317 cohort-wide transmission rate of rare heterozygous CNVs among parent-child duos from  
318 genetically reconstructed pedigrees generated with PRIMUS<sup>27</sup>. The training set was targeted to  
319 47.5% transmission, achieving 47.36% transmission in the training set, 46.02% in the test set,  
320 and 46.59% combined. This includes several small (1-3 exon) CNVs (~29% of loci) transmitted  
321 at 42.17%, with single-exon CNVs (~8% of loci) being transmitted at 38.96% (**Supplementary**  
322 **Table S1**).

### 323 **CNV validation data**

324 In a prior study<sup>7</sup>, we validated select common and rare CNV loci identified by CLAMMS using  
325 TaqMan qPCR and demonstrated higher performance and resolution than alternative exome

326 CNV callers as well as CNV detection from SNP arrays. In the present study, we have  
327 expanded our validation set to include additional TaqMan qPCR validation on a representative  
328 set of 100 high-confidence CNV loci identified in 259 parent-child duos, with a focus on small  
329 CNVs (1-3 exon; 86/100 loci) having at least one duo in which a non-transmission is predicted  
330 from CLAMMS (i.e. present in the parent, absent in the child). This provided an unbiased  
331 method to test the sensitivity and specificity of CLAMMS at high-confidence small CNV loci,  
332 particularly with respect to interpretation of the cohort-wide transmission rate estimates (42.17%  
333 for 1-3 exon CNVs, 38.96% for single-exon CNVs; **Supplementary Table S1**). Among the small  
334 CNV loci, we observed 10.5% of non-transmission calls did not qPCR validate, corresponding to  
335 a 2.2% FPR, 8% FNR, and a total error rate of 5.3% (1-accuracy). Among single-exon CNVs,  
336 we observed a 3.5% FPR, 9.2% FNR, and a total error rate of 6.6% (**Supplementary Table**  
337 **S3**).

338 In addition to TaqMan qPCR validations, a large subset of samples (N=34,246) were  
339 processed with Illumina HumanOmniExpressExome-8v1-2 genotyping arrays in twelve batches  
340 and subsequently tested with PennCNV<sup>28</sup>. PennCNV calls were quality controlled using a 95<sup>th</sup>  
341 percentile cutoff applied to each batch for samples having extreme Log-R Ratio standard  
342 deviation (LRR\_SD) and B Allele Frequency (BAF) drift. Calls at neighboring loci were  
343 considered for merging using the clean\_cnv module with the --bp combine\_seg flag. We tested  
344 the transmission rate of PennCNV calls from samples in identified parent-child duo relationships  
345 having fewer than 50 CNVs (N=21,792), as excessive numbers of CNVs often indicate low  
346 sample quality, high rates of *de novo* mutation, or somatic copy number variation that would  
347 confound transmission rate calculations. Consistent with our previous observations<sup>7</sup>, we found  
348 that PennCNV calls were only reliable (i.e. produced transmission rates close to 50%) at size  
349 thresholds approaching >100 Kb or larger (**Supplementary Figure S4**).

## 350 **Statistical Analysis**

351 Associations between CNVs and lipid traits were performed using a linear mixed model  
352 implemented in BOLT-LMM<sup>29</sup> with a genetic relationship matrix included as a random effect.  
353 Deletions and duplications at the same locus were considered separately. Median values for  
354 serially measured laboratory traits, including total cholesterol, low-density lipoprotein cholesterol  
355 (LDL-C), high-density lipoprotein cholesterol (HDL-C) and triglycerides were calculated for all  
356 individuals with two or more measurements in the EHR following removal of likely spurious  
357 values that were > 3 standard deviations from the intra-individual median value. For the  
358 purposes of exome-wide association analysis of serum lipid levels, total cholesterol, LDL-C,  
359 triglycerides, and HDL-C were adjusted for lipid-altering medication use by dividing by 0.8, 0.7,  
360 0.82, and 1.044, respectively, to estimate pre-treatment lipid values. Medication-adjusted HDL-  
361 C and triglycerides were log<sub>10</sub> transformed, and medication-adjusted LDL-C and total cholesterol  
362 values were not transformed. We then calculated trait residuals after adjustment for age, age<sup>2</sup>,  
363 sex, and the first ten principal components of ancestry, and rank-inverse-normal transformed  
364 these residuals prior to exome-wide association analysis (**Supplementary Methods**).

365

## 366 **References**

- 367 1. Zhang, F., Gu, W., Hurles, M. E. & Lupski, J. R. Copy Number Variation in Human  
368 Health, Disease, and Evolution. *Annu. Rev. Genom. Human Genet.* **10**, 451–481 (2009).
- 369 2. Coe, B. P. *et al.* Refining analyses of copy number variation identifies specific genes  
370 associated with developmental delay. *Nat Genet* **46**, 1063–1071 (2014).
- 371 3. Sudmant, P. H. *et al.* Global diversity, population stratification, and selection of human  
372 copy-number variation. *Science* **349**, aab3761 (2015).
- 373 4. Handsaker, R. E., Van Doren, V. & Berman, J. R. Large multiallelic copy number  
374 variations in humans. *Nat Genet* **47**, 296–303 (2015).
- 375 5. Tan, R. *et al.* An Evaluation of Copy Number Variation Detection Tools from Whole-

- 376 Exome Sequencing Data. *Human Mutation* **35**, 899–907 (2014).
- 377 6. Hong, C. S., Singh, L. N., Mullikin, J. C. & Biesecker, L. G. Assessing the reproducibility  
378 of exome copy number variations predictions. *Genome Medicine* **8**, 612 (2016).
- 379 7. Packer, J. S. *et al.* CLAMMS: a scalable algorithm for calling common and rare copy  
380 number variants from exome sequencing data. *Bioinformatics* **32**, 133–135 (2016).
- 381 8. Carey, D. J. *et al.* The Geisinger MyCode community health initiative: an electronic health  
382 record–linked biobank for precision medicine research. *Genetics in Medicine* **18**, 906–913  
383 (2016).
- 384 9. Dewey, F. E. *et al.* Distribution and clinical impact of functional variants in 50,726 whole-  
385 exome sequences from the DiscovEHR study. *Science* **354**, aaf6814–aaf6814 (2016).
- 386 10. Ruderfer, D. M. *et al.* Patterns of genic intolerance of rare copy number variation in  
387 59,898 human exomes. *Nat Genet* **48**, 1107–1111 (2016).
- 388 11. Fromer, M. *et al.* Discovery and Statistical Genotyping of Copy-Number Variation from  
389 Whole-Exome Sequencing Depth. *The American Journal of Human Genetics* **91**, 597–  
390 607 (2012).
- 391 12. Bassett, A. S. *et al.* Practical Guidelines for Managing Patients with 22q11.2 Deletion  
392 Syndrome. *The Journal of Pediatrics* **159**, 332–339.e1 (2011).
- 393 13. Chance, P. F. *et al.* Two autosomal dominant neuropathies result from reciprocal DNA  
394 duplication/deletion of a region on chromosome 17. *Human Molecular Genetics* **3**, 223–  
395 228 (1994).
- 396 14. Leigh, S., Foster, A. H. & Whittall, R. A. Update and analysis of the University College  
397 London low density lipoprotein receptor familial hypercholesterolemia database. *Annals*  
398 *of Human Genetics* **72**, 485–498 (2008).
- 399 15. Abul-Husn, N. S. *et al.* Genetic identification of familial hypercholesterolemia within a  
400 single U.S. health care system. *Science* **354**, aaf7000–aaf7000 (2016).
- 401 16. Hirayasu, K. & Arase, H. Functional and genetic diversity of leukocyte immunoglobulin-



- 402 like receptor and implication for disease associations. *Journal of Human Genetics* **60**,  
403 703–708 (2015).
- 404 17. Teslovich, T. M., Musunuru, K., Smith, A. V. & Edmondson, A. C. Biological, clinical and  
405 population relevance of 95 loci for blood lipids. *Nat Genet* **466**, 707–713 (2010).
- 406 18. Chiang, C. *et al.* The impact of structural variation on human gene expression. *bioRxiv*  
407 (2016). doi:10.1101/055962
- 408 19. Boettger, L. M. *et al.* Recurring exon deletions in the HP (haptoglobin) gene contribute to  
409 lower blood cholesterol levels. *Nat Genet* 1–9 (2016). doi:10.1038/ng.3510
- 410 20. Wald, D. S. *et al.* Child–Parent Familial Hypercholesterolemia Screening in Primary Care.  
411 *N Engl J Med* **375**, 1628–1637 (2016).
- 412 21. Boone, P. M. *et al.* The Alu-Rich Genomic Architecture of SPAST Predisposes to Diverse  
413 and Functionally Distinct Disease-Associated CNV Alleles. *The American Journal of*  
414 *Human Genetics* **95**, 143–161 (2014).
- 415 22. Dewey, F. E. *et al.* Inactivating Variants in ANGPTL4 and Risk of Coronary Artery  
416 Disease. *N Engl J Med* **374**, 1123–1133 (2016).
- 417 23. Reid, J. G. *et al.* Launching genomics into the cloud: deployment of Mercury, a next  
418 generation sequence analysis pipeline. *BMC Bioinformatics* **15**, 30 (2014).
- 419 24. Li, H. & Durbin, R. Fast and accurate short read alignment with Burrows-Wheeler  
420 transform. *Bioinformatics* **25**, 1754–1760 (2009).
- 421 25. Li, H. Aligning sequence reads, clone sequences and assembly contigs with BWA-MEM.  
422 *arXiv* (2013).
- 423 26. McKenna, A. *et al.* The Genome Analysis Toolkit: A MapReduce framework for analyzing  
424 next-generation DNA sequencing data. *Genome Research* **20**, 1297–1303 (2010).
- 425 27. Staples, J. *et al.* PRIMUS: Rapid Reconstruction of Pedigrees from Genome-wide  
426 Estimates of Identity by Descent. *The American Journal of Human Genetics* **95**, 553–564  
427 (2014).

- 428 28. Wang, K. *et al.* PennCNV: An integrated hidden Markov model designed for high-  
429 resolution copy number variation detection in whole-genome SNP genotyping data.  
430 *Genome Research* **17**, 1665–1674 (2007).
- 431 29. Loh, P. R., Tucker, G., Bulik-Sullivan, B. K. & Vilhjalmsón, B. J. Efficient Bayesian  
432 mixed-model analysis increases association power in large cohorts. *Nat Genet* **47**, 284–  
433 290 (2015).
- 434 30. Lek, M. *et al.* Analysis of protein-coding genetic variation in 60,706 humans. *Nat Genet*  
435 **536**, 285–291 (2016).

## 436 **Acknowledgements**

437 The authors would like to thank the MyCode Community Health Initiative participants for their  
438 permission to utilize their health and genomics information in the DiscovEHR collaboration and  
439 for their ongoing engagement in multiple facets of this research. The authors also thank David  
440 D’Ambrosio and Jennifer Espert for performing the TaqMan qPCR validation experiments and  
441 Dr. Scott Myers for assisting with clinical correlations. This research was funded by the  
442 Regeneron Genetics Center, a wholly-owned subsidiary of Regeneron Pharmaceuticals. This  
443 study was also partially supported by grant RO1MH074090 (Drs. Ledbetter and Martin) from the  
444 National Institute of Mental Health. Regeneron manufactures and markets Praluent  
445 (alirocumab), a *PCSK9* inhibiting antibody, for treatment of familial hypercholesterolemia and  
446 other indications. Under the relevant agreement with the Geisinger Health System (GHS),  
447 Regeneron is prohibited from making genomic DNA samples and individual level phenotype  
448 information obtained from the GHS MyCode-DiscovEHR Project available to another party, and  
449 Regeneron is prohibited from disclosing a copy of the agreement to another party. A patent  
450 application on the CLAMMS copy number variant calling method has been filed by Regeneron,  
451 and a patent application that contains data in the manuscript has been filed by Regeneron.

452

453

## 454 Figures

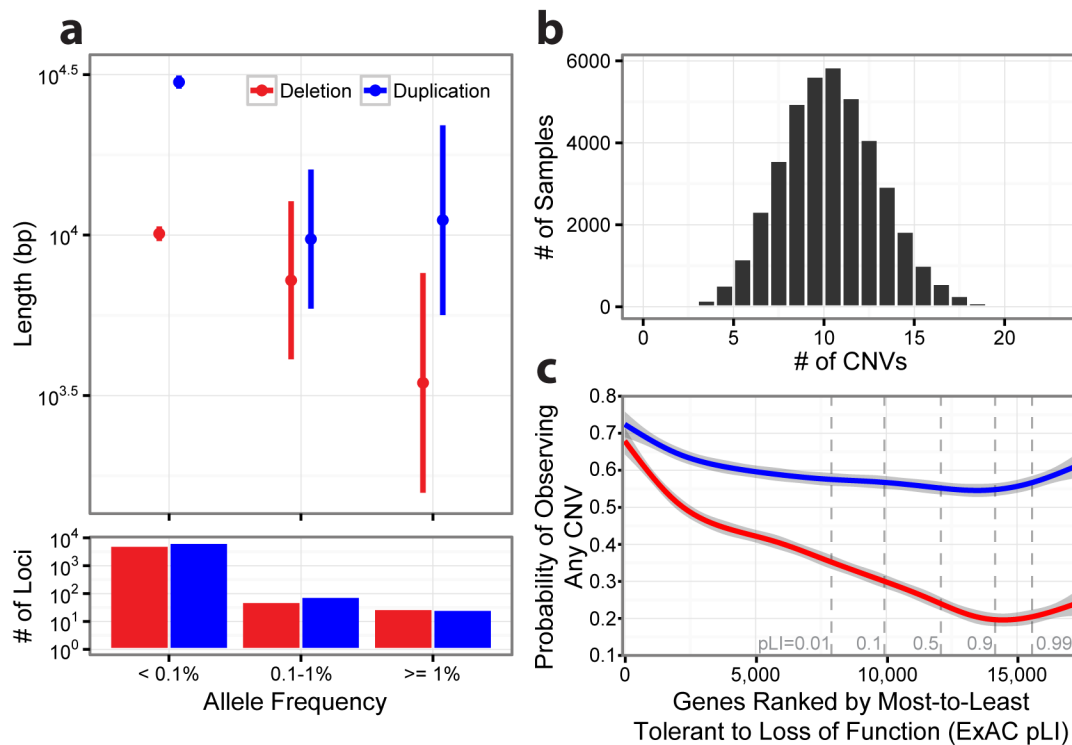

455

456 **Figure 1: Exome-wide survey of high-confidence CNVs from 47,349 individuals.**

457 **A)** Mean length (95% confidence bands) for deletion and duplication loci at varying allele  
458 frequency ranges. **B)** Sample-wise distribution of CNV count (**Supplementary Table S2**). **C)**  
459 Comparison of CNV intolerance in genes relative to loss-of-function (LOF) intolerance  
460 probabilities computed from single nucleotide variants (ExAC pLI metric v0.3<sup>30</sup>). While  
461 duplications are observed consistently in ~60% of genes regardless of LOF intolerance,  
462 observed deletion frequencies decrease in concordance with LOF intolerance.

463

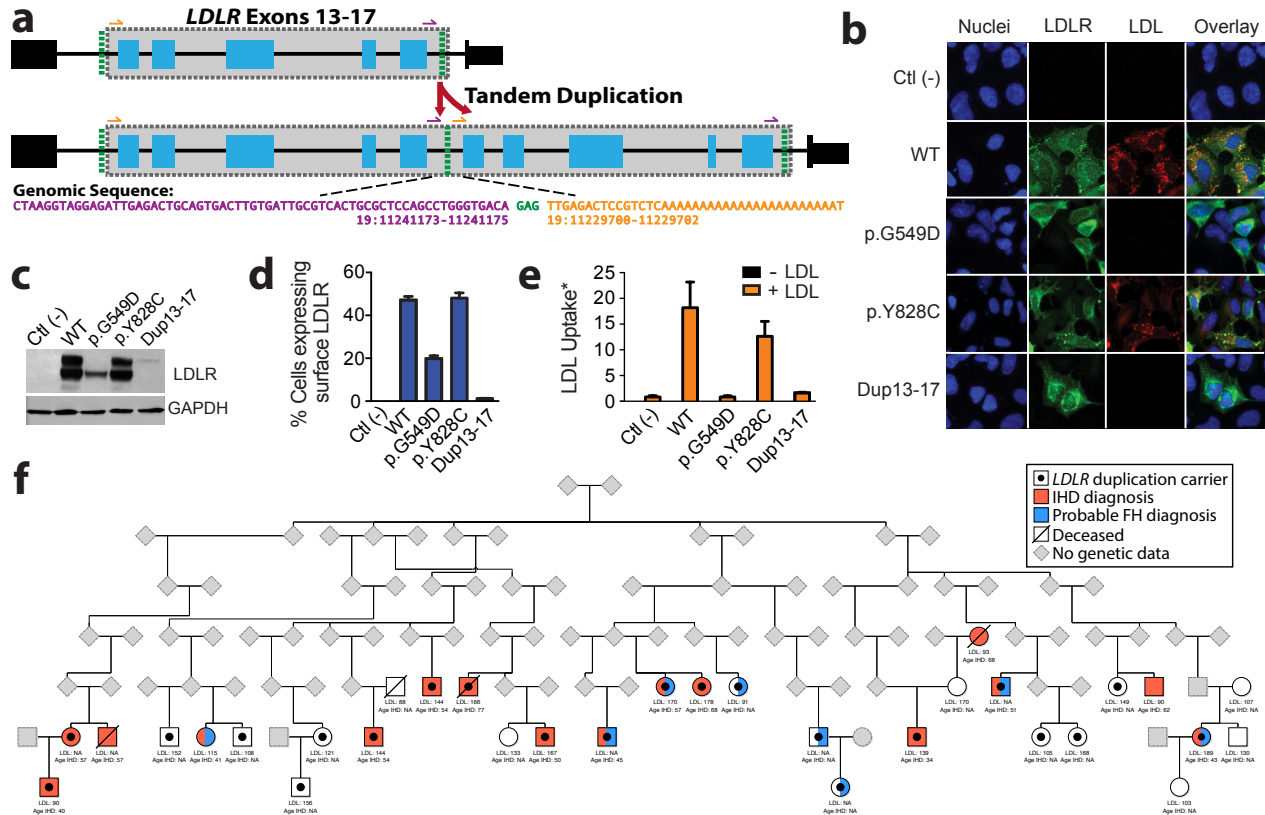

464

465 **Figure 2: A familial hypercholesterolemia-associated tandem duplication within *LDLR***

466 **causes loss-of-function and segregates with high LDL cholesterol and heart disease**

467 **A)** Whole-genome sequencing and Sanger validation (**Supplementary Fig. S6**) confirmed the

468 *LDLR* duplication in 29 individuals occurs in tandem encompassing exons 13-17 (“Dup13-17”).

469 Both the breakpoint and insertion loci occur in intronic *Alu* repeat sequences, having a shared

470 three nucleotide microhomology (green). The predicted protein translation is in-frame, creating a

471 larger mutant receptor (**C**) that is not expressed on the cellular surface (**B & D, Supplementary**

472 **Fig. S13**), resulting in significantly reduced LDL uptake activity and loss-of-function (**B & E**). **F)**

473 Reconstructed pedigree estimate containing 22/29 carriers of the duplication and ten unaffected

474 related (first or second degree) individuals from the sequenced cohort. Five additional carriers

475 (not drawn) are included in this pedigree (**Supplementary Methods**). Elevated LDL and total

476 cholesterol as well as increased prevalence of coronary artery disease and early-onset ischemic

477 heart disease (“Age IHD” <55 for males and <65 for females) segregate with duplication

478 carriers; but only eight carriers have a probable FH diagnosis coded in their EHRs

479 (Supplementary Methods). \*LDL Uptake = Cytoplasmic LDL Puncti / # GFP+ Cells.

480 **Tables**

| Phenotype                                                       | MIM #             | Locus   | Primary Gene | CNV     | Observed Frequency (N Carriers) | Estimated Population Rate |
|-----------------------------------------------------------------|-------------------|---------|--------------|---------|---------------------------------|---------------------------|
| <b>Autosomal dominant or sporadic Mendelian CNVs</b>            |                   |         |              |         |                                 |                           |
| Adult-onset leukodystrophy                                      | 169500            | 5q23.2  | <i>LMNB1</i> | DUP     | 2.1x10 <sup>-5</sup> (1)        | 1 in 47,349               |
| Spinocerebellar ataxia type 20                                  | 608687            | 11q12   |              | DUP     | 0.0 (0)                         | < 1 in 47,349             |
| Hereditary Neuropathy with Liability to Pressure Palsies (HNPP) | 162500            | 17p12   | <i>PMP22</i> | DEL     | 5.5x10 <sup>-4</sup> (26)       | 1 in 2,255                |
| Charcot-Marie-Tooth Disease Type 1A (CMT1A)                     | 118220            | 17p12   | <i>PMP22</i> | DUP     | 4.4x10 <sup>-4</sup> (21)       | 1 in 2,785                |
| DGS/VCFS                                                        | 188400/<br>192430 | 22q11.2 | <i>TBX1</i>  | DEL     | 2.5x10 <sup>-4</sup> (12)       | 1 in 3,946                |
| Microduplication 22q11.2                                        | 608363            | 22q11.2 |              | DUP     | 0.00139 (66)                    | 1 in 717                  |
| <b>Autosomal recessive Mendelian CNVs</b>                       |                   |         |              |         |                                 |                           |
| Gaucher disease                                                 | 230800            | 1q21    | <i>GBA</i>   | DEL     | 2.1x10 <sup>-5</sup> (1)        | 1 in 47,349               |
| Familial juvenile nephronophthisis                              | 256100            | 2q13    | <i>NPHP1</i> | DEL     | 0.00682 (323)                   | 1 in 147                  |
| beta-thalassemia                                                | 141900            | 11p15   | <i>HBB</i>   | DEL     | 4.2x10 <sup>-5</sup> (2)        | 1 in 23,675               |
| alpha-thalassemia                                               | 141750            | 16p13.3 | <i>HBA</i>   | DEL     | 4.2x10 <sup>-5</sup> (2)        | 1 in 23,675               |
| Pituitary dwarfism                                              | 262400            | 17q24   | <i>GH1</i>   | DEL     | 2.1x10 <sup>-5</sup> (1)        | 1 in 47,349               |
| <b>X-linked Mendelian CNVs</b>                                  |                   |         |              |         |                                 |                           |
| Ichthyosis                                                      | 308100            | Xp22.31 | <i>STS</i>   | DEL     | 0.00109 (52)                    | 1 in 911                  |
| Intellectual disability                                         | 300706            | Xp11.22 | <i>HUWE1</i> | DUP     | 5.9x10 <sup>-4</sup> (28)       | 1 in 1,691                |
| Pelizaeus-Merzbacher disease                                    | 312080            | Xq22.2  | <i>PLP1</i>  | DEL/DUP | 0.0 (0)                         | < 1 in 47,349             |
| Hemophilia A                                                    | 306700            | Xq28    | <i>F8</i>    | DEL     | 0.0 (0)                         | < 1 in 47,349             |
| Hunter syndrome                                                 | 309900            | Xq28    | <i>IDS</i>   | DEL     | 0.0 (0)                         | < 1 in 47,349             |
| Progressive neurological symptoms (MR+SZ)                       | 300260            | Xq28    | <i>MECP2</i> | DUP     | 2.1x10 <sup>-5</sup> (1)        | 1 in 47,349               |

481 **Table 1: Observed frequencies of select known disease-associated CNV loci.**

482

483

| CNV Locus                   |      |               |       | Allele                | Beta   | Beta    | Standard |                       |
|-----------------------------|------|---------------|-------|-----------------------|--------|---------|----------|-----------------------|
| Coordinates                 | Type | Genes         | Trait | Frequency             | (LMM)  | (mg/dl) | Error    | P-value               |
| (hg19)                      |      |               |       |                       |        |         | (LMM)    |                       |
| chr19:11230767-<br>11241993 | DUP  | <i>LDLR</i>   | LDL   | $2.53 \times 10^{-4}$ | 1.734  | 76.17   | 0.234    | $1.3 \times 10^{-13}$ |
| chr19:11230767-<br>11241993 | DUP  | <i>LDLR</i>   | TCHOL | $2.53 \times 10^{-4}$ | 1.384  | 60.87   | 0.235    | $3.8 \times 10^{-9}$  |
| chr19:54801926-<br>54804607 | DEL  | <i>LILRA3</i> | HDL   | $1.71 \times 10^{-1}$ | 0.052  | 0.65    | 0.010    | $4.5 \times 10^{-7}$  |
| chr16:15125591-<br>16292040 | DUP  | Many          | LDL   | $1.53 \times 10^{-3}$ | -0.439 | -14.07  | 0.095    | $3.6 \times 10^{-6}$  |

484 **Table 2: Exome-wide significant associations between high-confidence exonic CNV loci**  
485 **and EHR-derived serum lipid traits (LDL-c, HDL-c, total cholesterol “TCHOL”, and**  
486 **triglycerides). LMM = Linear Mixed Model (Methods).**
